# Supplementary material for: Rhodosporidium toruloides: a new platform organism for conversion of lignocellulose into terpene biofuels and bioproducts
Source: PubMed Central journal article supplement (PMC5651578; doi:10.1186/s13068-017-0927-5), 2017-10-23

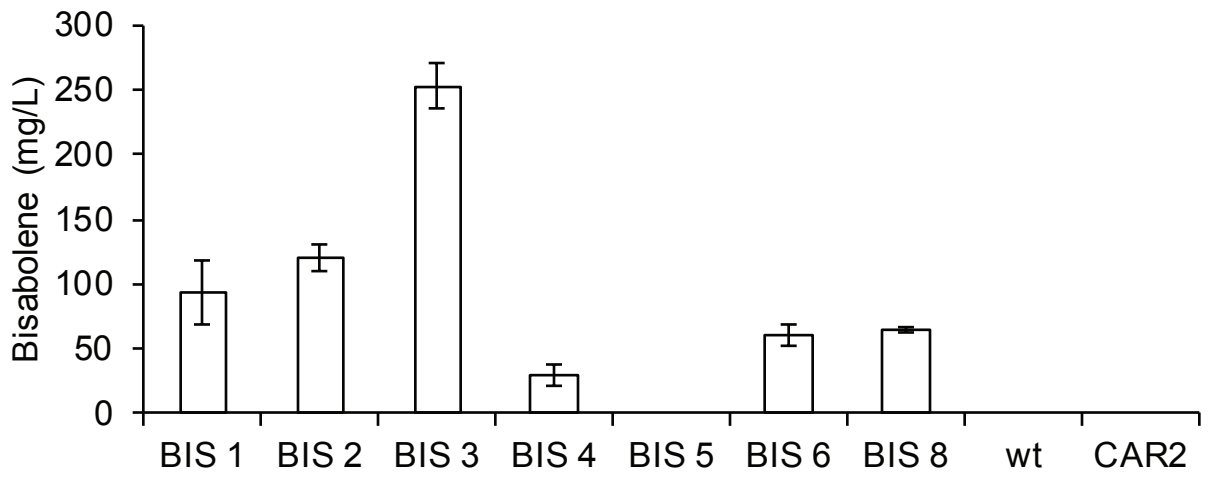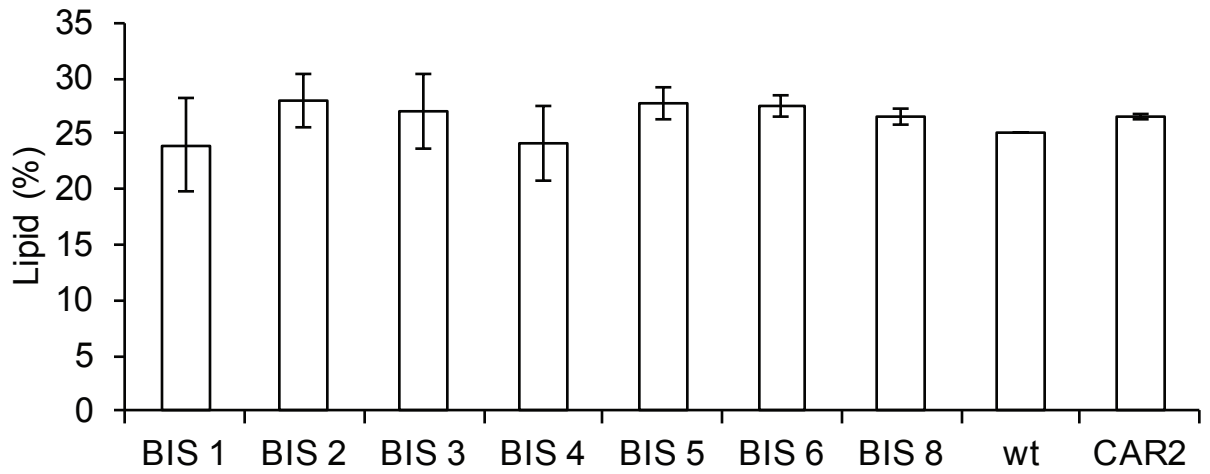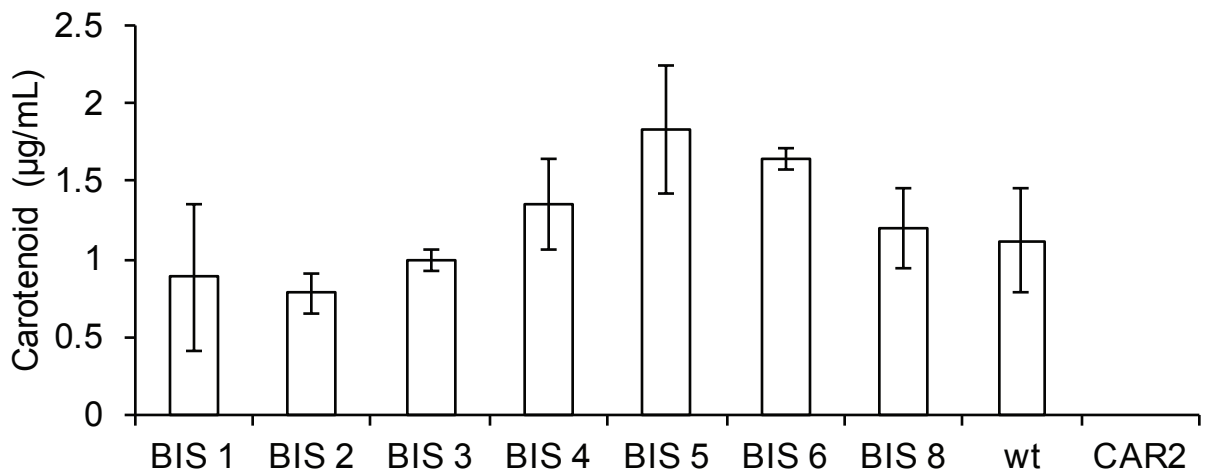

Supplement: 13068_2017_927_MOESM2_ESM.pdf [file 13068_2017_927_MOESM2_ESM.pdf]
